# Supplementary material
Source: Springer Nature journal article supplement (https://www.springermedizin.de/resource/supplementary/13063_2012_1312_MOESM2_ESM.pdf/9619814)
Supplement: MOESM2 [file 9619814]

|                |                             |                                                   |                                                     |
|----------------|-----------------------------|---------------------------------------------------|-----------------------------------------------------|
| Adverse events | Non-device related          | Device or procedure related                       |                                                     |
| Non-serious    | Adverse event (AE)          | Adverse Device Effect (ADE)                       |                                                     |
| Serious        | Serious Adverse Event (SAE) | Serious Adverse Device Effect (SADE)              |                                                     |
|                |                             | Anticipated                                       | Unanticipated                                       |
|                |                             | Anticipated Serious Adverse Device Effect (ASADE) | Unanticipated Serious Adverse Device Effect (USADE) |
